# Supplementary material for: Comprehensive Analysis of a tRNA-Derived Small RNA in Colorectal Cancer
Source: PubMed Central journal article supplement (PMC8371552; doi:10.3389/fonc.2021.701440), 2021-08-04
Supplement: DataSheet_1.pdf [file DataSheet_1.pdf]

## **Supplementary Appendix**

**Comprehensive analysis of a tRNA-Derived Small RNA in Colorectal Cancer**

**Supplementary Figure S1.** Workflow of data process. tsRNA expression levels on GEO paired colon cancer and normal were used to identify candidate biomarkers(Left panel). Right panel: diagnostic marker selection, random-forest analyses were used to a discovery data to identify a final determination of four markers. These four markers were applied to two independent validation cohort. Prognostic marker selection, Univariate-Cox and LASSO-Cox were applied to a TCGA cohort with survival data to identify markers' final determination. These markers were used to function prediction tsRNA-miRNA network and pathway analysis.

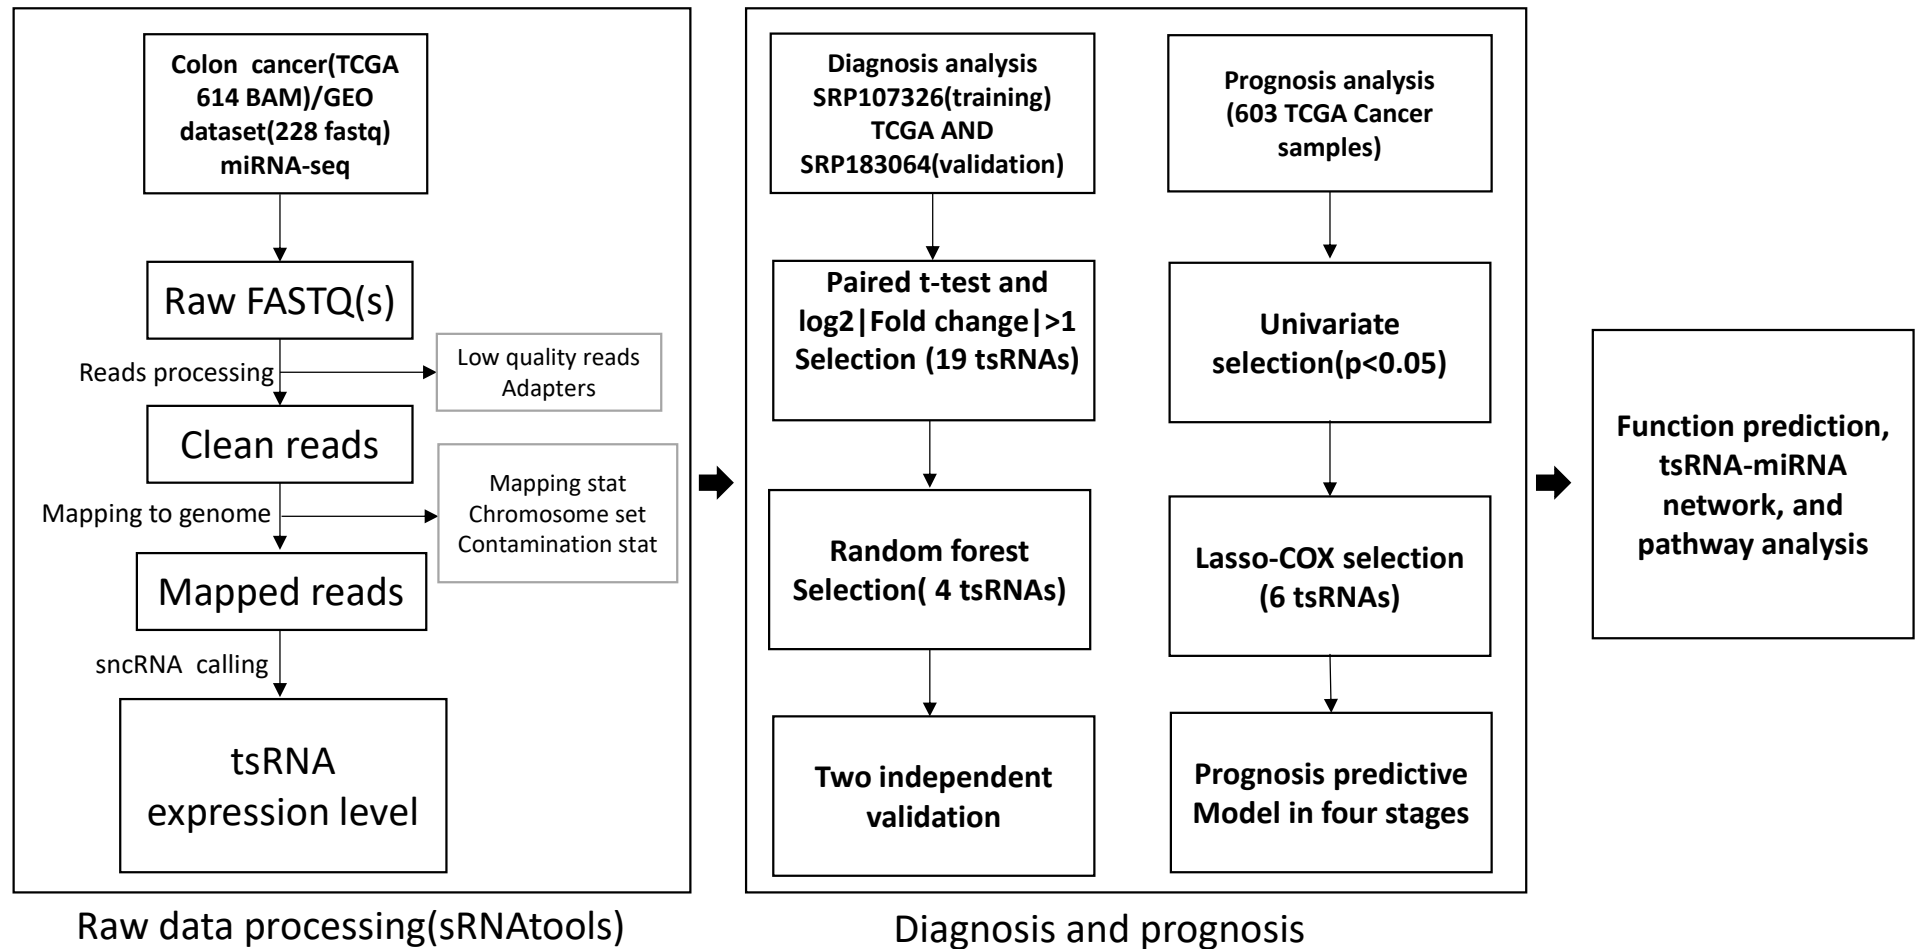

A

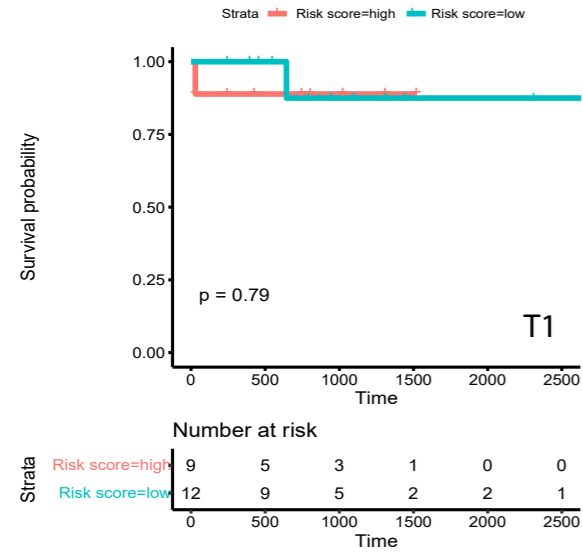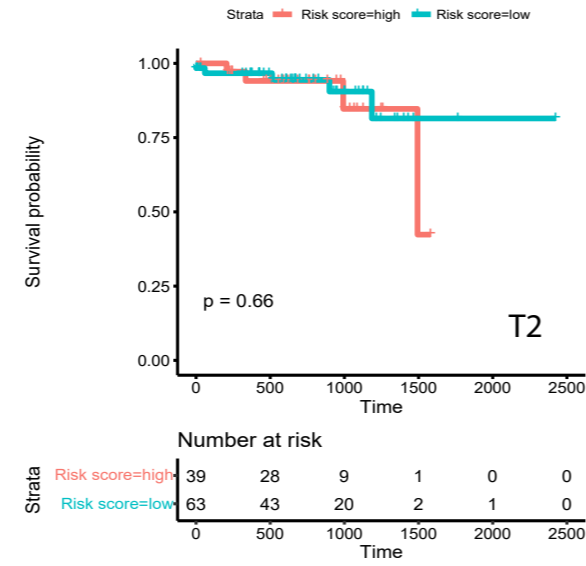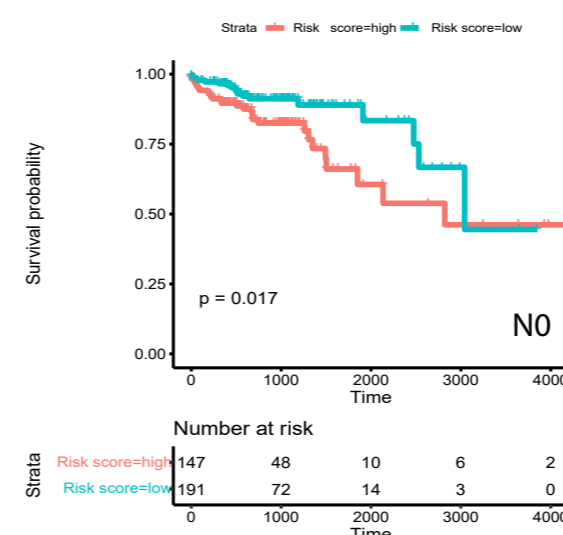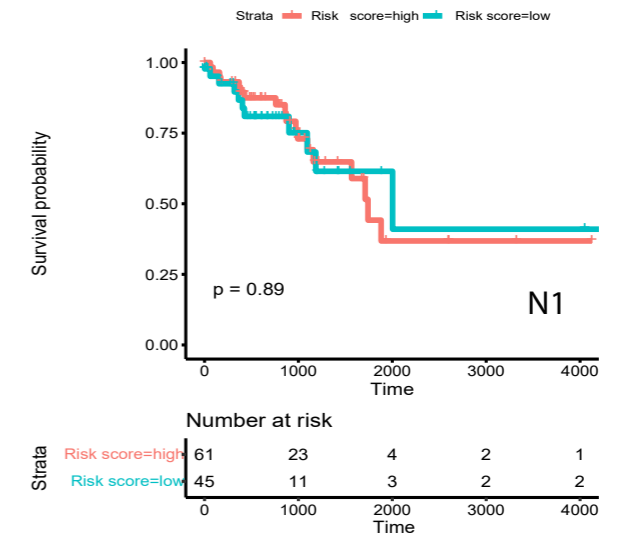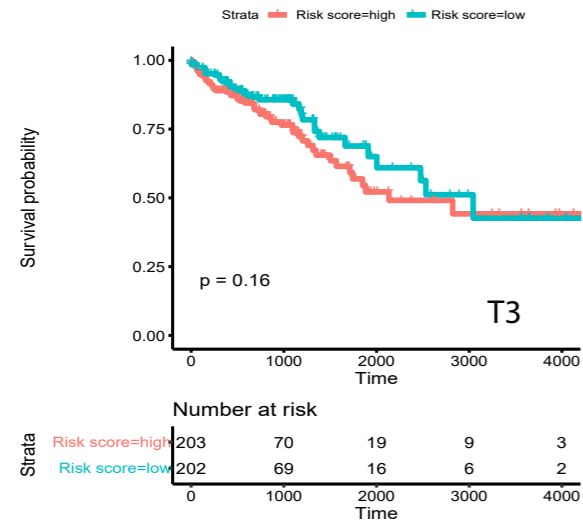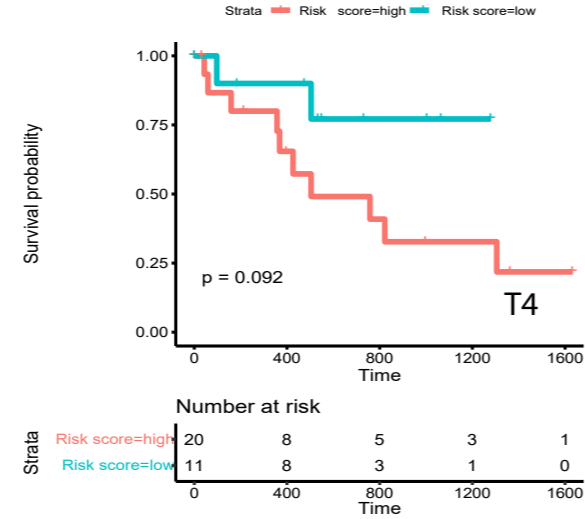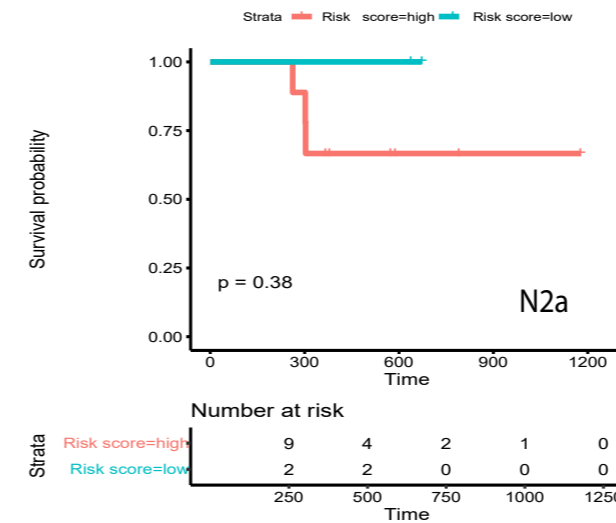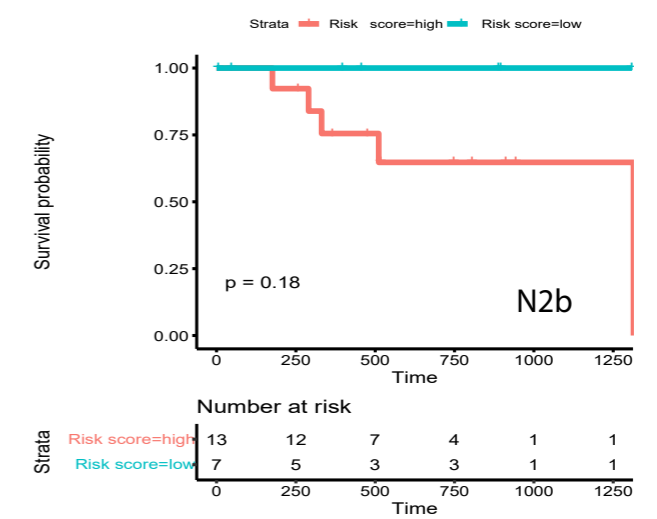

C

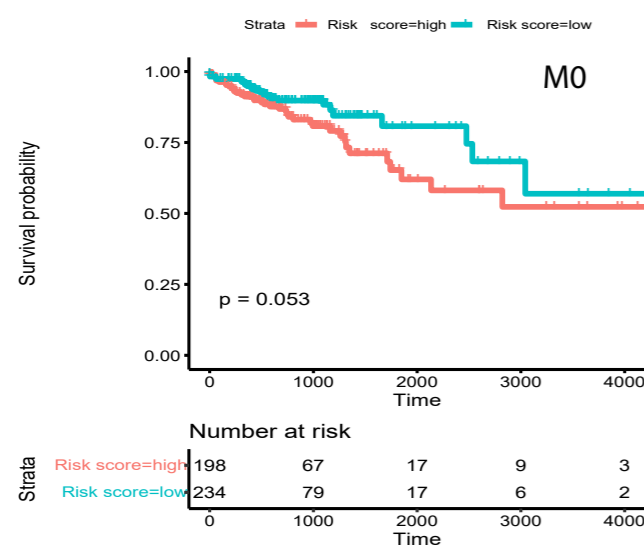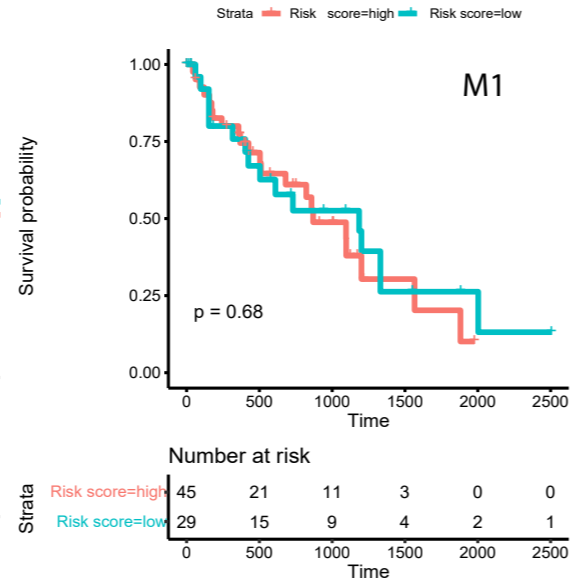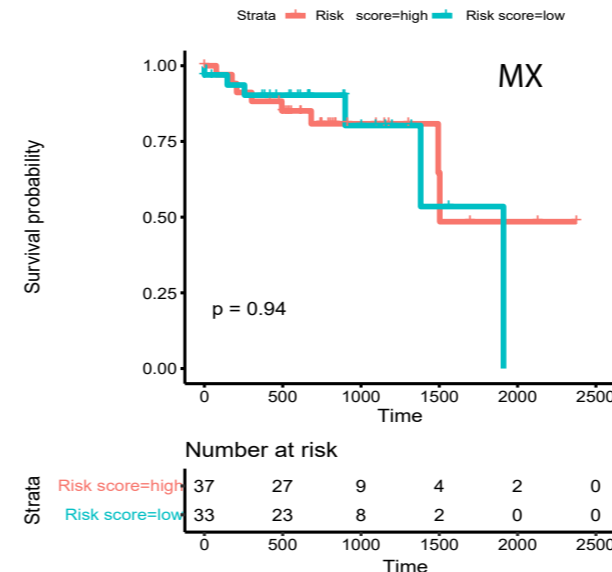

**Supplementary Figure S2.** Survival analysis at different tumor stages. Prognostic model in A, Primary tumor (T); B, Regional lymph nodes (N); C, Distant metastasis (M).

**Supplementary Table 1.** A list of tsRNAs that p-value less than 0.05 with tRF sequences when the paired student t-test was evaluated.

| ID      | Sequence                                       | p Values    | Fold Change (C/N) | FDR         |
|---------|------------------------------------------------|-------------|-------------------|-------------|
| var_60  | TCCCGGTGTGGGAACCA                              | 3.67E-15    | 4.663809097       | 2.86E-13    |
| var_47  | CAGTCGGTAGAGCATGGGACT                          | 1.09E-13    | 0.621708431       | 4.27E-12    |
| var_37  | TCTCGGTGGGACCTCCA                              | 3.28E-12    | 1.79950102        | 8.54E-11    |
| var_109 | GCCCGGATAGCTCAGTCGGTAGAGCATCAGACT              | 3.48E-11    | 0.45055736        | 6.8E-10     |
| var_112 | CGGATAGCTCAGTCGGTAGAGCATCAGAC                  | 3.64E-10    | 0.511958765       | 5.68E-09    |
| var_110 | TCCCTGTTGGGCGCCA                               | 8.45E-10    | 0.589661746       | 0.000000011 |
| var_111 | CCCTGTTGGGCGCCA                                | 2.96E-09    | 0.609152479       | 0.000000033 |
| var_118 | AAGAGGAGTTGTTTT                                | 5.15E-09    | 0.574344188       | 5.02E-08    |
| var_41  | CCACGTTGGGCGCCA                                | 1.33E-08    | 1.501943969       | 0.000000115 |
| var_107 | GAAGCGGGTGCTCTTATTTTT                          | 4.32E-08    | 0.69382188        | 0.000000337 |
| var_94  | GTGTAATGGTTAGCACTCTG                           | 9.19E-08    | 1.540276228       | 0.000000603 |
| var_35  | CATAATCTGAAGGCCT                               | 9.28E-08    | 0.669723782       | 0.000000603 |
| var_65  | ACCTCAGAAGGTCTCACTTT                           | 0.000000155 | 0.657821804       | 0.000000932 |
| var_73  | ATGGTAGAGCTCTCGC                               | 0.000000894 | 1.453409391       | 0.00000498  |
| var_44  | AGTCGGTAGAGCATC                                | 0.00000155  | 0.597636377       | 0.00000806  |
| var_7   | TCCCCAGTACCTCCACCA                             | 0.0000025   | 1.357625196       | 0.0000122   |
| var_93  | TAGTGGTTAGTACTCTGCGTT                          | 0.00000465  | 0.683657969       | 0.0000213   |
| var_39  | GCCCGACTAGCTCAGTCGGTAGAGCATGGGACT              | 0.00000785  | 1.360577984       | 0.000034    |
| var_3   | TTAACCGAAAGGTTGGTGGTTCGAGCCCACCCAGGGACGCC<br>A | 0.0000122   | 0.678849094       | 0.0000501   |
| var_5   | AGTGGTAGAGCATTTGACT                            | 0.0000856   | 0.766626221       | 0.000323959 |

|         |                                     |             |             |             |
|---------|-------------------------------------|-------------|-------------|-------------|
| var_88  | CCCCGTCCGTGCCTCCA                   | 0.0000872   | 0.759613212 | 0.000323959 |
| var_85  | TTCGTCTGTAATTTT                     | 0.0000924   | 0.647075084 | 0.000327662 |
| var_36  | ATCTCGGTGGAACCTCCA                  | 0.0001266   | 0.746116142 | 0.000429339 |
| var_26  | GGTTCGATTCCCGGCC                    | 0.000155345 | 1.380505299 | 0.000504872 |
| var_115 | CTCCTGGCTGGCTCGCCA                  | 0.000174497 | 0.588720748 | 0.000544429 |
| var_17  | GCCCCGGCTAGCTCAGTCGGTAGAGCATGGGACTC | 0.000233815 | 1.341323257 | 0.000701445 |
| var_1   | TCGTTTCCCGGCCAACGCACCA              | 0.000270644 | 0.763418478 | 0.000781861 |
| var_9   | CCCGGCACCTCCACCA                    | 0.000338962 | 0.799397137 | 0.000944252 |
| var_24  | GGCTCCGTGGCGCAATGGA                 | 0.000540142 | 1.273350881 | 0.001452796 |
| var_70  | GCATTGGTGGTTCAGTGGTAGAATTCTCGCCT    | 0.000588695 | 0.614061321 | 0.001530606 |
| var_45  | CAGTCGGTAGAGCATGAGACT               | 0.000632679 | 1.28954763  | 0.001591903 |
| var_80  | CCGAAGATCACGGGT                     | 0.001402488 | 0.829588372 | 0.003418566 |
| var_14  | GCCCCGGCTAGCTCAGTCGGTAGAGCATGAGACT  | 0.001623455 | 2.292244192 | 0.003837258 |
| var_62  | GGTAGCGTGGCCGAGCGGTCTAAGGC          | 0.002139559 | 1.220331551 | 0.004908399 |
| var_27  | TCCCCGTACGGGCCACCA                  | 0.002733085 | 1.346561172 | 0.006090875 |
| var_43  | CAGTCGGTAGAGCATC                    | 0.003289586 | 1.26185163  | 0.007127437 |
| var_13  | TCCGGGTGCCCCCTC                     | 0.004424447 | 3.191802855 | 0.009327213 |
| var_22  | GACCGCGTGGCCTAATGGATAAGGCGTCTGACT   | 0.004714213 | 0.873846917 | 0.009676543 |
| var_2   | CCCACCCAGGGACGCCA                   | 0.00591554  | 0.749006989 | 0.01183108  |
| var_74  | ATGGTAGAGAGCTCGC                    | 0.006494284 | 1.189193006 | 0.012663853 |
| var_121 | TCCCTGGTGGTCTAGTGGTTAGGATTCGGCGCT   | 0.008562143 | 0.877138025 | 0.016288955 |
| var_108 | GCCCCGATAGCTCAGTCGGTAGAGCATCAGAC    | 0.009938899 | 0.829412525 | 0.018457956 |
| var_20  | ATCTCGCTGGGGCCTCCA                  | 0.021628076 | 0.902362925 | 0.039232323 |
| var_114 | GGGCCAGTGGCGCAATGGATAACGCGTCTGACT   | 0.024422961 | 1.20654233  | 0.043054976 |
| var_69  | CCGTACGGGCCACCA                     | 0.024839409 | 1.306931916 | 0.043054976 |
| var_15  | GCCCCGGCTAGCTCAGTCGGTAGAGCATGGGACT  | 0.026668403 | 1.805607979 | 0.045220335 |
| var_58  | GTTCCGTAGTGTAGTGGTCATCACGTTTCGCT    | 0.028792055 | 1.153449233 | 0.046912552 |

|         |                                 |             |             |             |
|---------|---------------------------------|-------------|-------------|-------------|
| var_42  | CCCCACGTTGGGCGCCA               | 0.028869263 | 1.201385927 | 0.046912552 |
| var_113 | GTCAGGATGGCCGAGT                | 0.03068149  | 1.204169763 | 0.048839923 |
| var_54  | GTTCCGTAGTGTAGTGGTTATCACGTTGCCT | 0.033952529 | 1.142138048 | 0.052965945 |
| var_99  | ATCCTGCTCACAGCGCCA              | 0.038553972 | 1.169001382 | 0.058964899 |
